# Supplementary material for: Sonication of Kirschner Wire as a Tool for the Microbiological Diagnosis of Diabetic Foot Infection
Source: Preprints.org preprint supplement (doi:10.20944/preprints202106.0364.v2), 2021-11-24
Supplement: Supplementary file 1 [file supplementary]

**Table S1.** The isolated pathogens in both methods.

| **CM**  **First day** | **CM**  **Fifth day** | **CM**  **Tenth day** | **KwM**  **First day** | **KwM**  **Fifth day** | **KwM**  **Tenth day** |
| --- | --- | --- | --- | --- | --- |
| **Negative** | *Candida parapsilosis* | **Negative** | *Candida parapsilosis* | **Negative** | **Negative** |
| *Chryseobacterium indologenes* | *Chryseobacterium indologenes* | *Chryseobacterium indologenes* | *Chryseobacterium indologenes* | *Chryseobacterium indologenes* | *Chryseobacterium indologenes* |
| *Enterococcus avium* | *Enterococcus avium* | ***Pseudomonas aeruginosa*** | *Enterococcus avium* | *Enterococcus avium* | *Enterococcus avium* |
| *Enterococcus faecalis Staphylococcus epidermidis* | *Enterococcus faecalis Staphylococcus epidermidis* | *Enterococcus faecalis Staphylococcus epidermidis* | *Enterococcus faecalis Staphylococcus epidermidis* | *Enterococcus faecalis Staphylococcus epidermidis* | **Negative** |
| **Negative** | **Negative** | ***Staphylococcus hominis*** | ***Klebsiella pneumoniae Proteus mirabilis*** | *Klebsiella pneumoniae Proteus mirabilis* | *Klebsiella pneumoniae Proteus mirabilis* |
| *Enterococcus avium Candida albicans* | *Enterococcus avium Candida albicans* | *Enterococcus avium Candida albicans* | *Enterococcus avium Candida albicans* | *Enterococcus avium Candida albicans* | *Enterococcus avium Candida albicans* |
| *Enterococcus faecalis Staphylococcus aureus Streptococcus mitis/oralis* | *Enterococcus faecalis Staphylococcus aureus Streptococcus mitis/oralis* | *Enterococcus faecalis Staphylococcus aureus Streptococcus mitis/oralis* | *Enterococcus faecalis Staphylococcus aureus Streptococcus mitis/oralis* | *Enterococcus faecalis Staphylococcus aureus Streptococcus mitis/oralis* | *Enterococcus faecalis Staphylococcus aureus Streptococcus mitis/oralis* |
| *Enterococcus faecalis Staphylococcus aureus Staphylococcus sciuri* | *Enterococcus faecalis Staphylococcus aureus Escherichia coli* | *Enterococcus faecalis Staphylococcus aureus Escherichia coli* | *Enterococcus faecalis Staphylococcus aureus Staphylococcus sciuri* | *Enterococcus faecalis Staphylococcus aureus Escherichia coli* | *Enterococcus faecalis Staphylococcus aureus Escherichia coli* |
| *Candida albicans* | *Candida albicans* | *Candida albicans* | *Candida albicans* | *Candida albicans* | *Candida albicans* |
| *Enterococcus faecalis Serratia rubidaea* | *Enterococcus faecalis Serratia rubidaea* | *Enterococcus faecalis Serratia rubidaea* | *Enterococcus faecalis Serratia rubidaea* | *Enterococcus faecalis Serratia rubidaea* | *Enterococcus faecalis Serratia rubidaea* |
| *Staphylococcus aureus Enterococcus avium* | *Staphylococcus aureus Enterococcus avium* | *Staphylococcus aureus Enterococcus avium* | *Staphylococcus aureus* | *Staphylococcus aureus Enterococcus avium* | *Staphylococcus aureus Enterococcus avium* |
| *Staphylococcus aureus* | *Staphylococcus aureus* | *Staphylococcus aureus* | *Staphylococcus aureus* | *Staphylococcus aureus* | *Staphylococcus aureus* |
| *Serratia liquefaciens Pseudomonas aeruginosa Enterococcus faecalis* | *Serratia liquefaciens Pseudomonas aeruginosa Enterococcus faecalis* | *Serratia liquefaciens Pseudomonas aeruginosa Enterococcus faecalis* | *Serratia liquefaciens Pseudomonas aeruginosa Enterococcus faecalis* | *Serratia liquefaciens Pseudomonas aeruginosa Enterococcus faecalis* | *Serratia liquefaciens Pseudomonas aeruginosa Enterococcus faecalis* |
| *Streptococcus mitis/oralis* | *Streptococcus mitis/oralis* | *Streptococcus mitis/oralis* | *Streptococcus mitis/oralis* | *Streptococcus mitis/oralis* | *Streptococcus mitis/oralis* |
| *Proteus vulgaris Enterococcus faecalis* | *Proteus vulgaris* | *Proteus vulgaris Enterococcus faecalis* | *Proteus vulgaris* ***Pseudomonas aeruginosa*** | *Proteus vulgaris Enterococcus faecalis* | *Proteus vulgaris Enterococcus faecalis* |
| *Citrobacter* spp. | *Citrobacter* spp. | *Citrobacter* spp. | *Citrobacter* spp. | *Citrobacter* spp. | *Citrobacter* spp. |
| *Proteus vulgaris Enterococcus faecalis* | *Proteus vulgaris Enterococcus faecalis* | *Proteus vulgaris Enterococcus faecalis* | *Proteus vulgaris Enterococcus faecalis* | *Proteus vulgaris Enterococcus faecalis* ***Morganella morganii*** | *Proteus vulgaris Enterococcus faecalis* |
| *Pseudomonas aeruginosa* | *Pseudomonas aeruginosa Staphylococcus aureus* ***Enterococcus faecalis*** | *Pseudomonas aeruginosa Staphylococcus aureus Enterococcus faecalis* | *Pseudomonas aeruginosa Staphylococcus aureus* | *Pseudomonas aeruginosa Staphylococcus aureus* | *Pseudomonas aeruginosa* |
| *Staphylococcus epidermidis* | *Staphylococcus epidermidis* | *Staphylococcus epidermidis* | *Staphylococcus epidermidis* | *Staphylococcus epidermidis* | *Staphylococcus epidermidis* |
| *Enterococcus faecalis Staphylococcus aureus* | *Enterococcus faecalis Staphylococcus aureus* | *Enterococcus faecalis Staphylococcus aureus* | *Enterococcus faecalis Staphylococcus aureus* | *Enterococcus faecalis Staphylococcus aureus* | *Enterococcus faecalis Staphylococcus aureus* |
| *Morganella morganii* | *Morganella morganii* | *Morganella morganii* | *Morganella morganii* | *Morganella morganii* | *Morganella morganii* |
| *Pseudomonas aeruginosa* | *Pseudomonas aeruginosa* | *Pseudomonas aeruginosa* | *Pseudomonas aeruginosa* | *Pseudomonas aeruginosa* | *Pseudomonas aeruginosa* |
| **Negative** | **Negative** | **Negative** | **Negative** | **Negative** | **Negative** |
| *Streptococcus oralis*/*mitis* | **Negative** | *Streptococcus oralis*/*mitis* | *Streptococcus oralis*/*mitis* | **Negative** | *Streptococcus oralis*/*mitis* ***Streptococcus agalactiae*** |
| *Staphylococcus aureus* | *Staphylococcus aureus* | *Staphylococcus aureus* | *Staphylococcus aureus* | *Staphylococcus aureus* | *Staphylococcus aureus* |
| *Pseudomonas aeruginosa* | *Pseudomonas aeruginosa* | *Pseudomonas aeruginosa* | *Pseudomonas aeruginosa* | *Pseudomonas aeruginosa* ***Enterococcus avium Enterococcus faecalis Klebsiella oxytoca*** | *Pseudomonas aeruginosa Enterococcus avium Enterococcus faecalis Klebsiella oxytoca* |
| *Klebsiella pneumoniae* | *Klebsiella pneumoniae Enterococcus faecalis* | *Klebsiella pneumoniae Enterococcus faecalis* | *Klebsiella pneumoniae* | *Klebsiella pneumoniae Enterococcus faecalis* | *Klebsiella pneumoniae Enterococcus faecalis* |
| *Morganella morgannii Enterococcus faecalis* | *Morganella morgannii Enterococcus faecalis* | *Morganella morgannii Enterococcus faecalis* | *Morganella morgannii Enterococcus faecalis* | *Morganella morgannii Enterococcus faecalis* | *Morganella morgannii Enterococcus faecalis* |
| *Staphylococcus aureus Enterococcus avium Morganella morgannii* | *Staphylococcus aureus Enterococcus avium Morganella morgannii* | *Staphylococcus aureus Enterococcus avium Morganella morgannii* | *Staphylococcus aureus Enterococcus avium Morganella morgannii* | *Staphylococcus aureus Enterococcus avium Morganella morgannii* | *Staphylococcus aureus Enterococcus avium Morganella morgannii* |
| **Negative** | *Staphylococcus epidermidis* | *Staphylococcus epidermidis* | *Staphylococcus epidermidis* | *Staphylococcus epidermidis* | *Staphylococcus epidermidis* |
| *Staphylococcus epidermidis* | *Staphylococcus epidermidis* | *Staphylococcus epidermidis* | *Staphylococcus epidermidis* | *Staphylococcus epidermidis* ***Morganella morganii*** | *Staphylococcus epidermidis Morganella morganii* |

CM (conventional method)

KwM (K-wire method)
